# Supplementary material
Source: Elsevier journal article supplement (https://www.sciencedirect.com/science/article/pii/S1134009619302542)
Supplement: mmc1 [file S1134009619302542:mmc1.docx]

**ANEXO I**

| Cuestionario enviado a los servicios de Cirugía cardiovascular para elaborar el registro de intervenciones de la SECTCV | |  | |  |  | |
| --- | --- | --- | --- | --- | --- | --- |
| 1. **CARDIOPATÍAS ADQUIRIDAS CON CIRCULACIÓN EXTRACORPÓREA** | |  | | | | |  | |  |
| 1.1 VALVULARES AISLADOS CON CEC | |
| 1.1.1 *Válvula aislada* |  | |
| - Sustitución Aórtica |
| - Sustitución Mitral |
| - Sustitución Tricúspide |
| - Sustitución Pulmonar |
| - Aórtica Reparación |
| - Mitral Reparación |
| - Tricúspide Reparación |
| - Pulmonar Reparación |
| 1.1.2 *Dos o más válvulas* |
| - Sustitución de dos válvulas |
| - Sustitución de una válvula y reparación de otra |
| - Reparación de dos válvulas |
| - Cirugía Sobre tres o más válvulas |
| 1.1.3 *Valvulares + revascularización* |
| - Prótesis aórtica + Derivación coronaria |
| - Plastia aórtica + Derivación coronaria |
| - Prótesis Mitral + Derivación coronaria |
| - Plastia mitral + Derivación coronaria |
| - Dos o más válvulas + Derivación coronaria |
| 1.1.4 *Tipo de prótesis utilizadas* |
| - Prótesis mecánicas |
| - Prótesis biológicas convencionales - Prótesis biológicas de despliegue rápido (excluyendo TAVI) |
| - Anillos protésicos |
| - Homoinjertos |
| - Prótesis vasculares con válvula mecánica |
| - Prótesis vascular con válvula biológica |
|  |
| 1.2 CIRUGIA CORONARIA CON CEC |
| 1.2.1 *Cirugía de revascularización aislada* |
| - Una derivación |
| - Dos derivaciones |
| - Tres o más derivaciones |
| - Pacientes con un injerto arterial |
| - Pacientes con más de un injerto arterial |
|  |
| 1.2.2 *Cirugía complicaciones mecánicas del infarto agudo de miocardio* |
| - Aneurisma ventricular con o sin revascularización |
| - Comunicación interventricular con o sin revascularización |
| - Ruptura cardíaca con o sin revascularización |
| - Insuficiencia mitral aguda con o sin revascularización |
|  |
|  |
| 1.3 CIRUGIA DE LA AORTA CON CEC |
| 1.3.1 *Cirugía de la aorta electiva* |
| - Sustitución aorta ascendente sin sustitución valvular aórtica (suprasinusal) |
| - Sustitución aorta ascendente con reparación valvular aórtica (suprasinusal + reparación) |
| - Sustitución aorta ascendente con sustitución valvular aórtica (suprasinusal + prótesis mecánica) |
| - Sustitución aorta ascendente con sustitución valvular aórtica (suprasinusal + prótesis biológica) |
| - Reemplazo de raíz aórtica (Bono-Bentall mecánico) |
| - Reemplazo de raíz aórtica (Bono-Bentall biológica) |
| - Sustitución arco aórtico aislado |
| - Sustitución parcial de arco aórtico y/o asociada a otros segmentos |
| - Sustitución aorta descendente |
| - Remodelado de raíz aórtica (Yacoub y variantes) |
| - Reimplantación de raíz aórtica (David y variantes) |
| - Intervención tipo Ross (y variantes) |
| - Aneurisma de aorta torácica descendente abierto con CEC |
| - Aneurisma toracoabdominal con CEC |
| - Cirugía de la aorta torácica asociada a revascularización miocárdica |
| - Cirugía de la aorta torácica asociada a otra valvulopatía |
|  |
| 1.3.2 *Síndrome aórtico agudo* |
| - Disección Tipo A |
| - Disección Tipo B |
| - Ruptura traumática aorta torácica |
|  |
|  |
| 1.4 OTROS PROCEDIMIENTOS CON CEC (MISCELANEA) |
| - Trasplante cardíaco |
| - Trasplante cardiopulmonar |
| - Cirugía arritmias con CEC No asociados a otros procedimientos |
| - Tumores cardíacos |
| - Implantación asistencia ventricular con CEC |
| - Cirugía de arritmias asociado o no a otro procedimiento - Otros |
|  |
| 1.5 OTROS ASPECTOS |
| - Toracotomías / Esternotomías mini-invasivas utilizadas |
| - Revascularización con Láser asociado o no a derivación |
| - Técnica Port-Access |
|  |
|  |
| 2. **CIRUGIA CONGENITOS CON CEC** |  | |
| - Comunicación interauricular | |  | | | | |  | |  |
| - Drenaje venoso pulmonar anómalo +/- Comunicación interauricular | |
| - Drenaje Venoso pulmonar anómalo total | |
| - Comunicación interventricular (incluye doble salida del ventrículo derecho sin estenosis pulmonar) | |
| - Defecto parcial del septo aurículoventricular (ostium primum y transicional) | |
| - Defecto completo del septo aurículoventricular | |
| - Tetralogía de Fallot o situación Fallot (incluye atresia pulmonar +CIV y doble salida del ventrículo derecho tipo Fallot) | |
| - Atresia pulmonar + CIV + grandes colaterales aortopulmonares | |
| - Trasposición de grandes arterias con septo intacto | |
| - Trasposición de grandes arterias compleja (asociada a CIV y/o arco y/o estenosis pulmonar) | |
| - Truncus arterioso | |
| - Estenosis aórtica discreta subvalvular (Membrana; Miomectomía) | |
| - Estenosis aórtica supravalvular | |
| - Sustitución valvular aórtica | |
| - Plastia valvular aórtica | |
| - Reemplazo de raíz aórtica (Ross y Ross-Konno) | |
| - Reemplazo de raíz aórtica (Bentall, Bentall-Konno) | |
| - Técnicas de remodelado y reemplazo de raíz (Yacoub, David y variantes) | |
| - Sustitución valvular mitral | |
| - Plastia valvular mitral | |
| - Sustitución valvular tricuspídea | |
| - Plastia valvular tricuspídea aislada | |
| - Válvula pulmonar plastia | |
| - Válvula pulmonar sustitución | |
| - Procedimientos sobre dos válvulas | |
| - Procedimientos sobre tres o más válvulas | |
| - Glenn | |
| - Fontan y variantes | |
| - Conversión de Fontan | |
| - Cirugía arco aórtico (interrupción, hipoplasia) | |
| - Arteria coronaria izquierda anómala saliendo del tronco pulmonar y anomalías coronarias | |
| - Fístula sistémico pulmonar con CEC | |
| - Norwood y variantes para el corazón izquierdo hipoplásico | |
| - Trasplante cardíaco | |
| - Trasplante cardiopulmonar | |
| - Otros con CEC | |
| - Pacientes congénitos menores de 1 mes con CEC | |
| - Pacientes congénitos mayores de 18 años con CEC | |
|  | |
| 3.**CIRUGÍA SIN CIRCULACIÓN EXTRACORPÓREA** | |
| 3.1 CORONARIOS | |
| - Una derivación | |
| - Dos derivaciones | |  | | | |  | |
| - Tres o más derivaciones | |
| - Pacientes con un injerto arterial - Pacientes con más de un injerto arterial | |
| 3.2 CONGENITOS | |
| - Fistulas sistémico-pulmonares | |
| - Cerclaje de arteria pulmonar | |
| - Coartación de aorta | |
| - Ductus <2,5 kg | |
| - Ductus >2,5 kg | |
| - Reparación de anillo vascular | |
| - Otros | |
| - Pacientes congénitos menores de 1 mes sin CEC | |
| - Pacientes congénitos mayores de 18 años sin CEC | |
| 3.3 OTRO TIPO DE PROCEDIMIENTOS | |
| (MISCELANEA) | |
| - Implantación de marcapasos | |
| - Cambio generador marcapasos | |
| - Implantación desfibrilador | |
| - Cambio generador desfibrilador | |
| - Ventana Pericárdica/Pericardiocentesis | |
| - Pericardiectomía | |
| - Reoperaciones por sangrado | |
| - Reintervenciones por mediastinitis | |
| - Reintervenciones por dehiscencia esternal | |
| - Asistencia ventricular sin CEC | |
| - Rotura de pared libre postinfarto sin CEC con o sin revascularización | |
| - ECMO | |
| - Válvula transcatéter vía apical | |
| - Válvula transcatéter vía femoral o vascular | |
| - Otros | |
|  | |
|  | |
| 4. **CIRUGÍA VASCULAR PERIFERICA** | |
| 4.1 CIRUGÍA ARTERIAL | |
| - Cirugía de revascularización del sector aorto-ilíaco | |
| - Cirugía de revascularización del sector femoropoplíteo y distal | |  | | | |  | |
| - Combinaciones | |
| - Cirugía troncos supra-aórticos | |
| - Simpatectomía lumbar | |
| 4.2 ANEURISMAS | |
| - Aneurisma aorta torácica abiertos sin CEC | |
| - Aneurisma de aorta torácica con endoprótesis | |
| - Aneurisma toracoabdominal abiertos sin CEC | |
| - Aneurisma de aorta toracoabdominal o yuxtarrenal con endoprótesis | |
| - Aneurisma aorta abdominal abiertos | |
| - Aneurisma de aorta abdominal con endoprótesis | |
| - Aneurisma arterias periféricas | |
|  | |
| 4.3 OTROS | |
| - Cirugía venosa | |
| - Amputaciones | |
| - Fístulas AV | |
| - Embolectomía | |
| - Trauma arterial | |
| - Otros | |
| - Combinaciones anteriores | |
|  | |
| **5. ACTIVIDAD ANUAL POR CIRUJANO / AÑO** | |
| 5.1 Número de intervenciones cirugía cardíaca mayor. Staff | |
| - Staff 1, Staff2, Staff 3, Staff 4, Staff 5, Staff 6, Staff 7, Staff 8, Staff 9, Staff 10 | |
| - Número de Staffs en el servicio | |
|  | |
| 5.2 Número de intervenciones cirugía cardíaca mayor. Residente | |
| - Residente 5º año, 4º año, 3º año, 2º año, 1º año | |
| - Otros residentes o becarios | |
| - Número de residentes/becarios en el servicio | |
|  | |
| 5.3 DEMANDAS JUDICIALES | |
|  | |
| - Demandas civiles en 2018 | |
| - Demandas penales en 2018 | |

**ANEXO II.** RELACIÓN DE HOSPITALES QUE ENVIARON SUS DATOS AL REGISTRO DE LA SECTCV DURANTE EL PERIODO 2012-2018.

1. **Hospital General Universitario de Valencia.** Valencia.
2. **Grupo Cardiovascular**. Málaga
3. **Hospital Universitario Gregorio Marañón (Infantil).** Madrid.
4. **Hospital Universitario Ramón y Cajal (Infantil).** Madrid.
5. **Hospital Universitario La Paz (Infantil).** Madrid.
6. **Hospital Clínico Universitario de Santiago.** A Coruña.
7. **Complejo Hospitalario de Navarra.** Navarra.
8. **Hospital Universitario Central de Asturias.** Oviedo.Asturias.
9. **Hospital Universitario Virgen de la Victoria.** Málaga.
10. **Hospital Universitario Infanta Cristina.** Badajoz.
11. **Hospital Universitario Virgen de la Arrixaca (Adultos e Infantil).** Murcia.
12. **Hospital Universitario de Canarias.** La Laguna. Sta. Cruz de Tenerife.
13. **Hospital Universitari Germans Trias i Pujol (Can Ruti).** Badalona. Barcelona
14. **Hospital Clínico Universitario de Valladolid.** Valladolid.
15. **Hospital Universitario Puerta del Mar.** Cádiz.
16. **Clínica Quirón salud.** Albacete
17. **Hospital Universitario La Paz (Adultos).** Madrid.
18. **Hospital Universitario La Fé (Infantil).** Valencia.
19. **Hospital Universitario Fundación Jiménez Díaz y Hospital Universitario Rey Juan Carlos.** Madrid.
20. **Hospital Universitario Son Espases.** Palma de Mallorca.
21. **Hospital Universitario La Fé (Adultos).** Valencia.
22. **Hospital Clínico Universitario de Salamanca.** Salamanca.
23. **Hospital de Bellvitge.** Hospitalet del Llobregat. Barcelona.
24. **Hospital Universitario de La Princesa.** Madrid.
25. **Policlínica Guipúzcoa.** San Sebastián. Guipúzcoa.
26. **Clínica Los Manzanos.** Logroño
27. **Hospital Universitario Clínico San Carlos.** Madrid.
28. **Hospital de Sant Pau.** Barcelona.
29. **Hospital Universitario Dr. Negrín.** Las Palmas de Gran Canaria
30. **Hospital Álvaro Cunqueiro.** Vigo.Pontevedra
31. **Hospital Materno Infantil Vall d’Hebrón (Infantil)**. Barcelona.
32. **Hospiten Rambla.** Santa Cruz de Tenerife.
33. **Complejo Hospitalario Universitario materno infantil de Las Palmas (Infantil).** Gran Canaria
34. **Hospital Vall d’Hebrón. (Adultos).** Barcelona.
35. **Hospital Universitario Marqués de Valdecilla.** Santander. Cantabria
36. **Hospital Clinic i Provincial.** Barcelona.
37. **Hospital Regional Universitario Carlos Haya (Adultos e Infantil).** Málaga.
38. **Hospital Universitario Puerta de Hierro-Majadahonda.** Madrid.
39. **Hospital neoláser cardiovascular.** Sevilla.
40. **Hospital Universitario Gregorio Marañón (Adultos).** Madrid.
41. **Hospital Universitario de León.** León.
42. **Hospital Universitario Miguel Servet (Adultos e Infantil).** Zaragoza.
43. **Hospital Universitario Virgen de la Macarena.** Sevilla.
44. **Complejo Hospitalario Universitario A Coruña (Adultos e Infantil).** ACoruña.
45. **Hospital Sant Joan de Déu (Infantil).** Barcelona.
46. **Hospital General de Alicante.** Alicante.
47. **Hospital Clínico.** Valencia.
48. **Hospital Ramón y Cajal. (Adultos).** Madrid.
49. **Hospital 12 de Octubre (Adultos).** Madrid.
50. **Policlínica Miramar.** Palma de Mallorca.
51. **Hospital universitario de Cruces (Adultos e Infantil).** Baracaldo. Vizcaya.
52. **Hospital de Basurto.** Bilbao**.** Vizcaya.
53. **Hospital del Vinalopó.** Alicante.
54. **Complejo Hospitalario de Toledo.** Toledo.
55. **Hospital Casa de Salud.** Valencia.
56. **Hospital de la Ribera.** Alzira. Valencia.
57. **Hospital 12 de Octubre. (Infantil).** Madrid.
58. **Hospital Universitario Virgen de las Nieves (Adultos e Infantil).** Granada.
59. **Hospital Universitario Virgen del Rocío (Adultos e Infantil).** Sevilla.
60. **Hospital Quirón.** Tenerife
61. **Cardiofast.** Madrid
62. **Clínica Universidad de Navarra.** Pamplona. Navarra.
63. **Hospital Universitario Reina Sofía (Adultos e Infantil).** Córdoba.
64. **Hospital General de Cataluña.** Sant Cugat. Barcelona.
65. **Hospital Universitario Quirón salud.** Madrid.
66. **Hospital Modelo.** La Coruña.

**Anexo-III**: Cirugía de las cardiopatías congénitas con circulación extracorpórea en 2018.

| CONGENITOS CON CEC | Casos | éxitus | % éxitus observado | Aristóteles Básico | % éxitus esperado* |
| --- | --- | --- | --- | --- | --- |
| CIA | 317 | 2 | 0,63 % | 3 | <1 % |
| Drenaje venoso pulmonar anómalo +/- CIA | 65 | 1 | 1,5 % | 5,76 | 5-10 % |
| Drenaje Venoso pulmonar anómalo total | 26 | 3 | 11,54 % | 9 | 5-10 % |
| CIV (incluye DSVD sin EP) | 230 | 0 | 0 % | 6,87 | 5-10 % |
| DPSAV (ostium primum y transicional) | 62 | 0 | 0 % | 4,82 | 1-5 % |
| Defecto completo del Septo auriculoventricular | 41 | 1 | 2,43 % | 9 | 5-10 % |
| T.Fallot o situación Fallot (Incluye AP+CIV y DSVD tipo Fallot) | 156 | 2 | 1,28 % | 8,51 | 5-10 % |
| Atresia pulmonar+CIV+MAPCAS | 18 | 2 | 11,11 % | 10,24 | 10-20 % |
| D-TGA con septo intacto | 50 | 3 | 6 % | 10,08 | 10-20 % |
| D-TGA compleja (asociada a CIV y/o arco y/o EP) | 25 | 4 | 16% | 12,18 | 10-20 % |
| Truncus arterioso | 9 | 1 | 11,11 % | 11 | 10-20 % |
| Estenosis aórtica discreta subvalvular (Membrana; Miomectomía) | 59 | 0 | 0 % | 6,31 | 5-10 % |
| Estenosis aórtica supravalvular | 5 | 1 | 20 % | 7,5 | 5-10 % |
| Sustitución valvular aórtica | 39 | 0 | 0 % | 9 | 5-10 % |
| Plastia valvular aórtica | 38 | 0 | 0 % | 8,45 | 5-10 % |
| Reemplazo de raíz aórtica (Ross y Ross-Konno) | 20 | 0 | 0 % | 12,14 | 10-20 % |
| Reemplazo de raíz aórtica (Bentall y Bentall-Konno) | 9 | 0 | 0 % | 9,77 | 5-10 % |
| Técnicas de remodelado y reemplazo de raíz (Yacoub, David y variantes) | 6 | 0 | 0 % | 8,33 | 5-10 % |
| Sustitución valvular mitral | 20 | 0 | 0 % | 7,5 | 5-10 % |
| Plastia valvular mitral | 30 | 1 | 3,33 % | 7,95 | 5-10 % |
| Sustitución valvular tricuspídea | 6 | 1 | 16,67 % | 7,5 | 5-10 % |
| Plastia valvular tricuspídea aislada | 14 | 0 | 0 % | 7,19 | 5-10 % |
| Válvula pulmonar plastia | 21 | 0 | 0 % | 6 | 5-10 % |
| Válvula pulmonar sustitución | 96 | 1 | 1,04 % | 6,95 | 5-10 % |
| Procedimientos sobre dos válvulas | 26 | 1 | 3,85 % | 7,7 | 5-10 % |
| Procedimientos sobre tres o más válvulas | 2 | 0 | 0 % | 8 | 5-10 % |
| Glenn | 39 | 1 | 2,56 % | 6,98 | 5-10 % |
| Fontan y variantes | 23 | 0 | 0 % | 9 | 5-10 % |
| Conversión de Fontan | 0 |  |  |  |  |
| Cirugía arco aórtico (interrupción, hipoplasia) | 43 | 1 | 2,32 % | 9,81 | 5-10 % |
| ALCAPA y anomalías coronarias | 23 | 0 | 0 % | 9,85 | 5-10 % |
| Fístula sistémico pulmonar con CEC | 14 | 1 | 7,14 % | 6,7 | 5-10 % |
| Norwood y variantes corazón izquierdo hipoplásico | 16 | 7 | 43,75 % | 13,75 | >20 % |
| Trasplante cardíaco | 35 | 4 | 11,42 % | 9,3 | 5-10 % |
| Trasplante cardiopulmonar | 1 | 1 | 100 % | 10,65 | 10-20 % |
| Otros con CEC | 106 | 9 | 8,49 % | 8,8 | 5-10 % |
| TOTAL CONGÉNITOS CON CEC | 1690 | 48 | 2,84 % | 7,4,78** | 1-5 % |
| *Pacientes congénitos menores de 1 mes con CEC* | 147 | 10 | 6,8 % | 9,93 | 5-10 % |
| *Pacientes congénitos mayores de 18 años con CEC* | 505 | 5 | 0,99% | 4,06 | 1-5 % |

CIA: comunicación interauricular, CIV: comunicación interventricular, DSVD: doble salida del ventrículo derecho, EP: estenosis pulmonar, DPSAV: defecto parcial del septo auriculoventricular, T. Fallot: tetralogía de Fallot, AP: atresia pulmonar, MAPCAS: colaterales aorto-pulmonares mayores, D-TGA: D-trasposición de grandes arterias, ALCAPA: arteria coronaria anómala saliendo de la arteria pulmonar, CEC: circulación extracorpórea

*Rango de mortalidad esperada según escala de Aristóteles básico por grupos de patología.

**Media ponderada de la clasificación del riesgo según escala de Aristóteles básico para el total de cirugía congénita con CEC.

**Anexo-IV:** Cirugía de las cardiopatías congénitas sin circulación extracorpórea en 2018.

| CONGENITOS SIN CEC | Casos | Nº éxitus | % éxitus observado | Aristóteles Básico | % éxitus esperado* |
| --- | --- | --- | --- | --- | --- |
| Fístulas sistémico-pulmonares | 26 | 3 | 11,5 % | 6,36 | 5-10 % |
| Banding arteria pulmonar | 43 | 4 | 9,3 % | 6 | 5-10 % |
| Coartación de aorta | 95 | 1 | 1 % | 7,43 | 5-10 % |
| Ductus <2,5 kg | 69 | 1 | 1,45 % | 3 | <1 % |
| Ductus >2,5 kg | 22 | 0 | 0 % | 3,45 | <1 % |
| Reparación de anillo vascular | 13 | 0 | 0 % | 6 | 5-10 % |
| Otros | 101 | 0 | 0 % | 5,81 | 5-10 % |
| TOTAL CONGENITOS SIN CEC | 369 | 9 | 2,44 % | 5,42** | 5-10 % |
| *Pacientes congénitos menores de 1 mes sin CEC* | 157 | 1 | 0,64 % | 4,98 | 1-5% |
| *Pacientes congénitos mayores de 18 años sin CEC* | 17 | 1 | 5,88 % | 6,28 | 1-5% |

*Rango de mortalidad esperada según escala de Aristóteles por grupos de patología.

**Media ponderada de la clasificación del riesgo según escala de Aristóteles para total de cirugía congénita sin CEC.
